# Supplementary material
Source: MDPI journal article supplement (https://www.mdpi.com/2073-4344/13/6/1001)
Supplement: s1 [file s1]

## Supplementary Figure

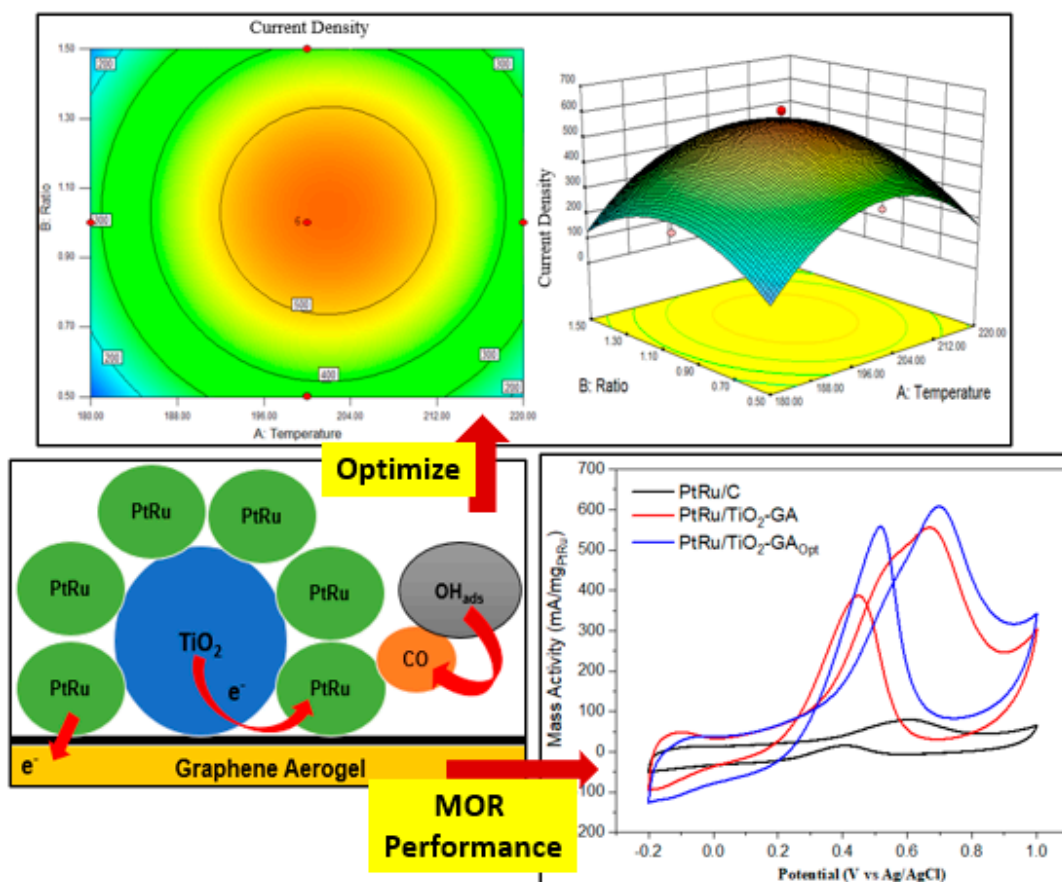

**Figure S1.** Activity of the catalyst during the CV electrochemical test.

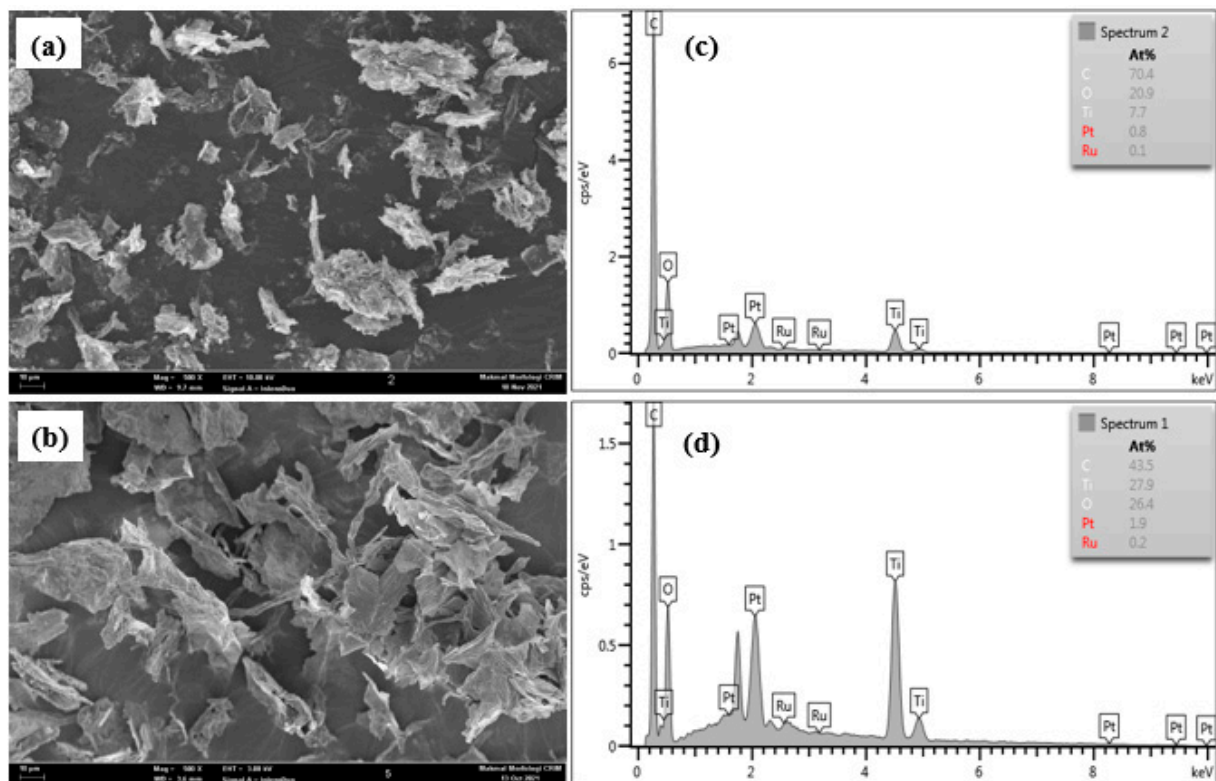

**Figure S2.** Surface morphology for (a) FESEM of TiO<sub>2</sub>-GA, (b) FESEM of PtRu/TiO<sub>2</sub>-GA, (c) EDX analysis of PtRu/TiO<sub>2</sub>-GA, (d) EDX analysis of PtRu/TiO<sub>2</sub>-GA.

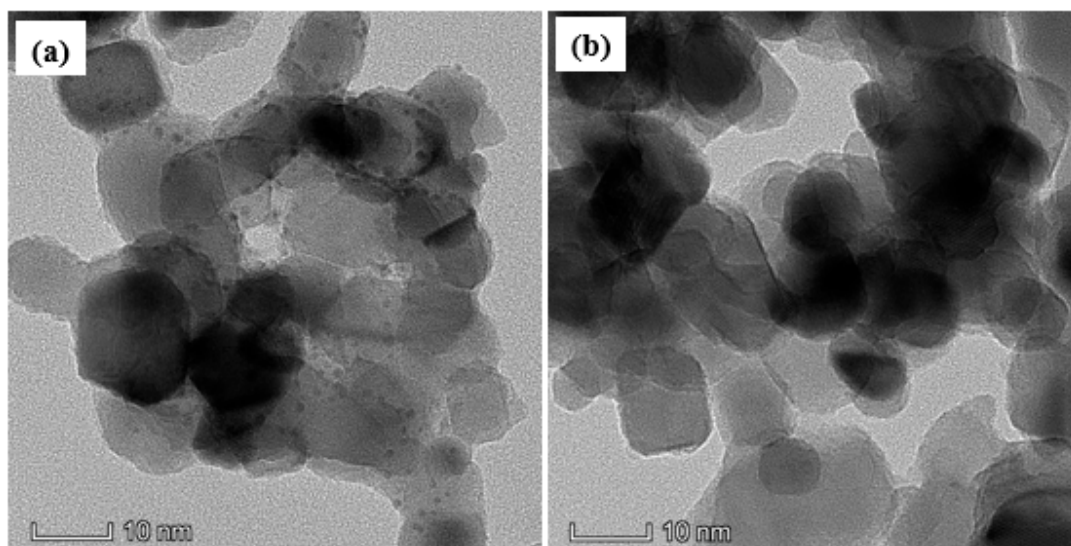

**Figure S3.** TEM images of the prepared (a) PtRu/TiO<sub>2</sub>-GA and (b) PtRu/TiO<sub>2</sub>-GA<sub>opt</sub>.
